# Supplementary material for: In Silico Docking, Resistance Modulation and Biofilm Gene Expression in Multidrug-Resistant Acinetobacter baumannii via Cinnamic and Gallic Acids
Source: MDPI journal article supplement (doi:10.3390/antibiotics11070870), 2022-06-28
Supplement: s1 [file s1]

**Supplementary Table S1. MICs of the selected 30 MDR isolates against colistin (CL), imipenem (IPM), doxycycline (DOX), amikacin (AMK), and levofloxacin (LVX) in presence/ absence of cinnamic or gallic acids.**

|         | MIC (µg/ml) |                         |                       |     |                          |                        |     |                          |                        |        |                          |                        |     |                          |                        |
|---------|-------------|-------------------------|-----------------------|-----|--------------------------|------------------------|-----|--------------------------|------------------------|--------|--------------------------|------------------------|-----|--------------------------|------------------------|
| Isolate | CL          | CL+<br>Cinnamic<br>acid | CL+<br>Gallic<br>acid | IPM | IPM+<br>Cinnamic<br>acid | IPM+<br>Gallic<br>acid | DOX | DOX+<br>Cinnamic<br>acid | DOX+<br>Gallic<br>acid | AMK    | AMK+<br>Cinnamic<br>acid | AMK+<br>Gallic<br>acid | LVX | LVX+<br>Cinnamic<br>acid | LVX+<br>Gallic<br>acid |
| 3       | 0.5         | 0.5                     | 0.5                   | 512 | 128                      | 4                      | 256 | 4                        | 16                     | 512    | 256                      | 128                    | 128 | 128                      | 128                    |
| 16      | 16          | 0.5                     | 16                    | 0.5 | 0.5                      | 0.5                    | 64  | 4                        | 4                      | 2048   | 128                      | 256                    | 32  | 32                       | 32                     |
| 30      | 0.5         | 0.5                     | 0.5                   | 256 | 128                      | 4                      | 64  | 4                        | 4                      | 8192   | 256                      | 128                    | 128 | 128                      | 128                    |
| 48      | 8           | 0.25                    | 8                     | 512 | 32                       | 4                      | 512 | 128                      | 32                     | 8192   | 2024                     | 512                    | 16  | 16                       | 16                     |
| 2       | 0.5         | 0.5                     | 0.5                   | 512 | 256                      | 4                      | 128 | 4                        | 4                      | 512    | 512                      | 128                    | 128 | 128                      | 128                    |
| 35      | 0.5         | 0.5                     | 0.5                   | 256 | 128                      | 4                      | 512 | 4                        | 4                      | 8192   | 1024                     | 128                    | 32  | 32                       | 32                     |
| 40      | 0.5         | 0.5                     | 0.5                   | 128 | 64                       | 4                      | 16  | 4                        | 4                      | 8192   | 128                      | 4000                   | 64  | 64                       | 64                     |
| 13      | 0.5         | 0.5                     | 0.5                   | 256 | 64                       | 16                     | 128 | 8                        | 8                      | 8192   | 2000                     | 128                    | 128 | 128                      | 128                    |
| 18      | 0.5         | 0.5                     | 0.5                   | 128 | 32                       | 32                     | 32  | 2                        | 2                      | 8192   | 1000                     | 8192                   | 64  | 64                       | 64                     |
| 4       | 16          | 0.25                    | 16                    | 256 | 128                      | 8                      | 16  | 2                        | 2                      | 8192   | 8000                     | 4000                   | 256 | 256                      | 256                    |
| 1       | 8           | 2                       | 8                     | 64  | 16                       | 4                      | 512 | 32                       | 64                     | 8192   | 256                      | 4000                   | 128 | 128                      | 128                    |
| 11      | 0.5         | 0.5                     | 0.5                   | 64  | 4                        | 2                      | 512 | 32                       | 128                    | 8192   | 128                      | 2000                   | 32  | 32                       | 32                     |
| 3       | 32          | 1                       | 32                    | 64  | 32                       | 1                      | 32  | 2                        | 2                      | 8192   | 2000                     | 2000                   | 32  | 32                       | 32                     |
| 76      | 0.5         | 0.5                     | 0.5                   | 64  | 1                        | 2                      | 32  | 0.25                     | 2                      | 8192   | 64                       | 4000                   | 32  | 32                       | 32                     |
| 97      | 0.5         | 0.5                     | 0.5                   | 128 | 8                        | 8                      | 512 | 32                       | 32                     | 8192   | 4000                     | 8000                   | 32  | 32                       | 32                     |
| 79      | 0.5         | 0.5                     | 0.5                   | 32  | 32                       | 1                      | 512 | 8                        | 8                      | 128000 | 8192                     | 1024                   | 64  | 64                       | 64                     |
| 30      | 0.5         | 0.5                     | 0.5                   | 512 | 512                      | 64                     | 512 | 32                       | 64                     | 4000   | 32                       | 4000                   | 128 | 128                      | 128                    |
| 87      | 0.5         | 0.5                     | 0.5                   | 16  | 16                       | 0.5                    | 256 | 8                        | 32                     | 128000 | 2000                     | 16000                  | 32  | 32                       | 32                     |
| 94      | 0.5         | 0.5                     | 0.5                   | 64  | 64                       | 1                      | 16  | 8                        | 0.25                   | 128000 | 8000                     | 8000                   | 16  | 16                       | 16                     |
| 35      | 16          | 0.5                     | 16                    | 16  | 8                        | 8                      | 512 | 128                      | 128                    | 2048   | 256                      | 1024                   | 16  | 16                       | 16                     |
| 20      | 0.5         | 0.5                     | 0.5                   | 32  | 32                       | 4                      | 64  | 16                       | 16                     | 256    | 256                      | 256                    | 32  | 32                       | 32                     |
| 5       | 0.5         | 0.5                     | 0.5                   | 256 | 64                       | 16                     | 16  | 8                        | 4                      | 128000 | 8000                     | 64000                  | 128 | 128                      | 128                    |
| Sam 109 | 0.5         | 0.5                     | 0.5                   | 64  | 8                        | 4                      | 32  | 16                       | 8                      | 128000 | 2000                     | 16000                  | 16  | 16                       | 16                     |
| G9      | 0.5         | 0.5                     | 0.5                   | 256 | 64                       | 16                     | 16  | 0.25                     | 2                      | 128000 | 4000                     | 16000                  | 256 | 256                      | 256                    |
| 50      | 0.5         | 0.5                     | 0.5                   | 16  | 4                        | 4                      | 0.5 | 0.5                      | 0.5                    | 1024   | 1024                     | 1024                   | 64  | 64                       | 64                     |
| 77      | 0.5         | 0.5                     | 0.5                   | 128 | 2                        | 16                     | 512 | 64                       | 128                    | 128000 | 64000                    | 4000                   | 16  | 16                       | 16                     |
| 88      | 0.5         | 0.5                     | 0.5                   | 128 | 16                       | 4                      | 32  | 8                        | 0.25                   | 128000 | 2000                     | 64000                  | 16  | 16                       | 16                     |
| 95      | 0.5         | 0.5                     | 0.5                   | 128 | 16                       | 16                     | 0.5 | 0.5                      | 0.5                    | 128000 | 4000                     | 64000                  | 32  | 32                       | 32                     |
